# Supplementary material
Source: PubMed Central journal article supplement (PMC3635841)
Supplement: NIHMS456432-supplement-1_si_001.pdf [file NIHMS456432-supplement-1_si_001.pdf]

# The adhesion of mussel foot protein-3 to TiO<sub>2</sub> surfaces: the effect of pH

Jing Yu<sup>1\*</sup>, Wei Wei<sup>2\*</sup>, Matthew S. Menyo<sup>3</sup>, Admir Masic<sup>4</sup>, J. Herbert Waite<sup>2,5</sup>  
and Jacob N. Israelachvili<sup>1,2</sup>;

<sup>1</sup>Chemical Engineering, University of California, Santa Barbara, California 93106, USA.

<sup>2</sup>Materials Research Laboratory, University of California, Santa Barbara, California 93106, USA.

<sup>3</sup>Biomolecular Science and Engineering, University of California, Santa Barbara, California 93106, USA

<sup>4</sup>Department of Biomaterials, Max Planck Institute for Colloids and Interfaces, 14424 Potsdam-Golm, Germany

<sup>5</sup>Department of Molecular, Cell & Developmental Biology, University of California, Santa Barbara, California 93106, USA.

## Supporting information

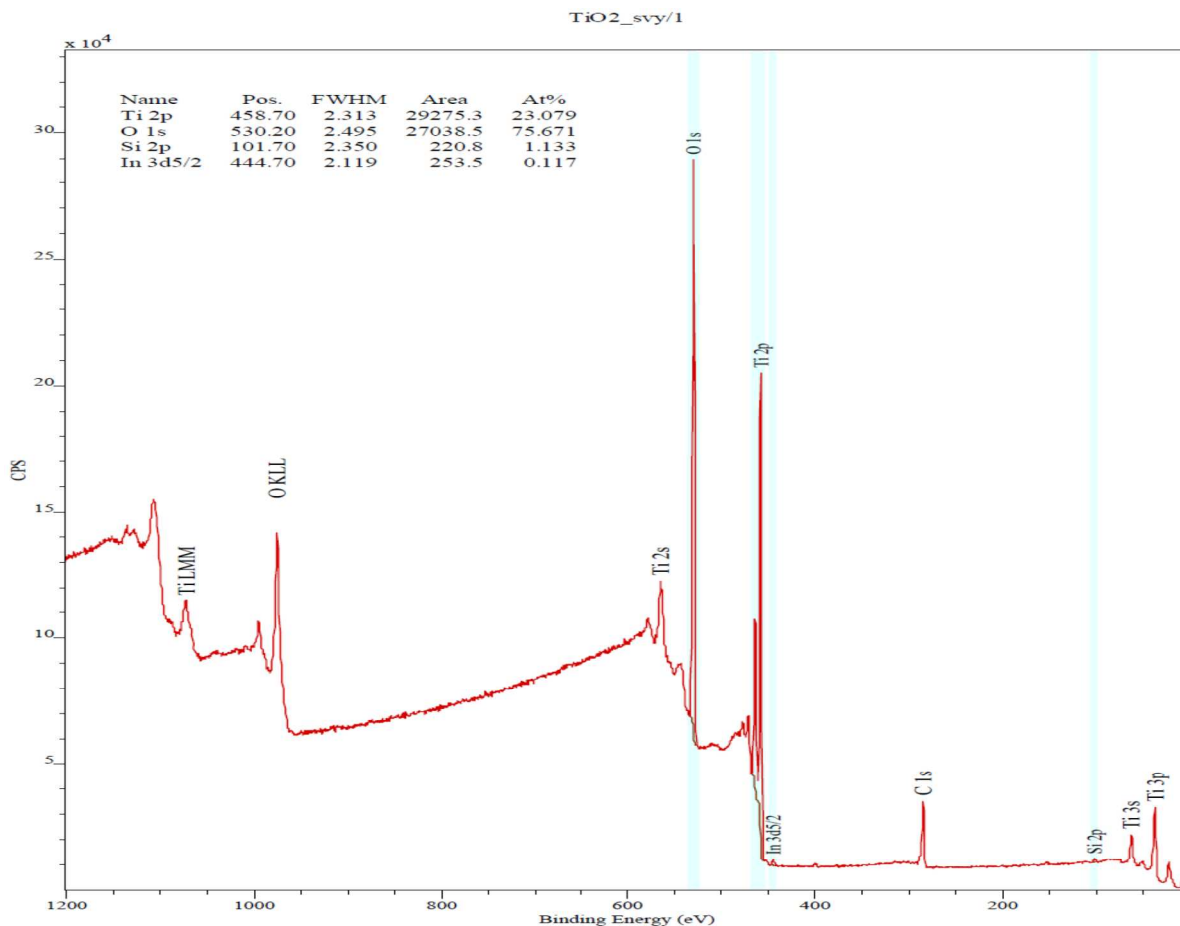

Figure S1. XPS spectra of a  $\text{TiO}_2$  layer (10 nm thick) deposited on a mica surface.

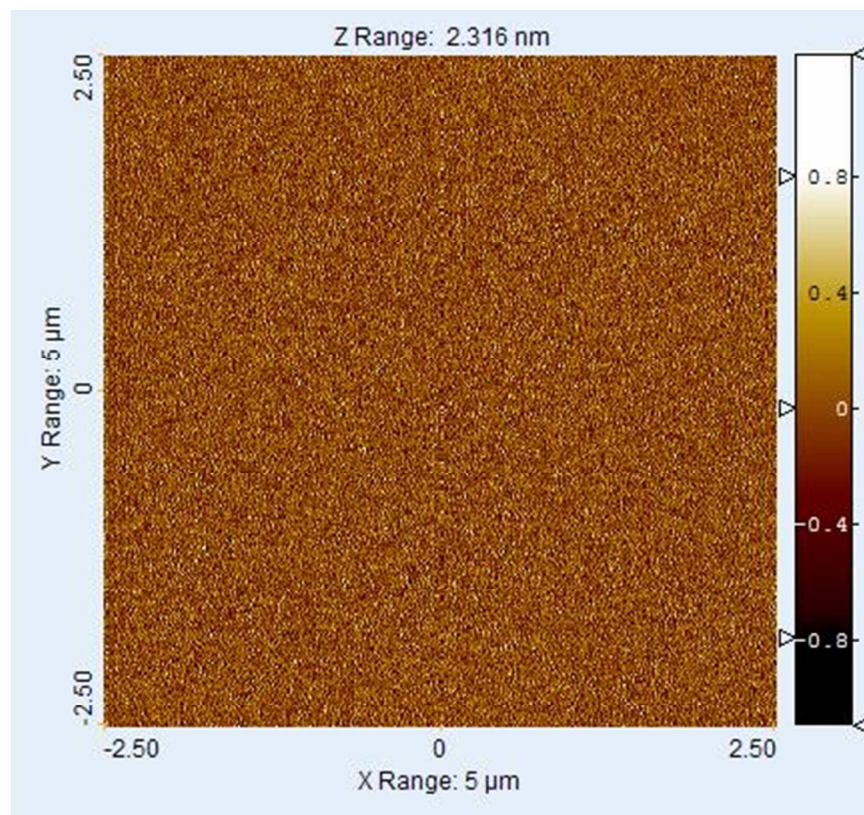

Figure S2. Tapping mode image ( $5\ \mu\text{m} \times 5\ \mu\text{m}$ ) of the surface profile of a 10 nm thick  $\text{TiO}_2$  layer deposited on a molecularly smooth mica substrate. The RMS roughness of the  $\text{TiO}_2$  surface is  $\sim 1\text{ nm}$ . The RMS roughness of mica is  $0.1\text{ nm}$ .

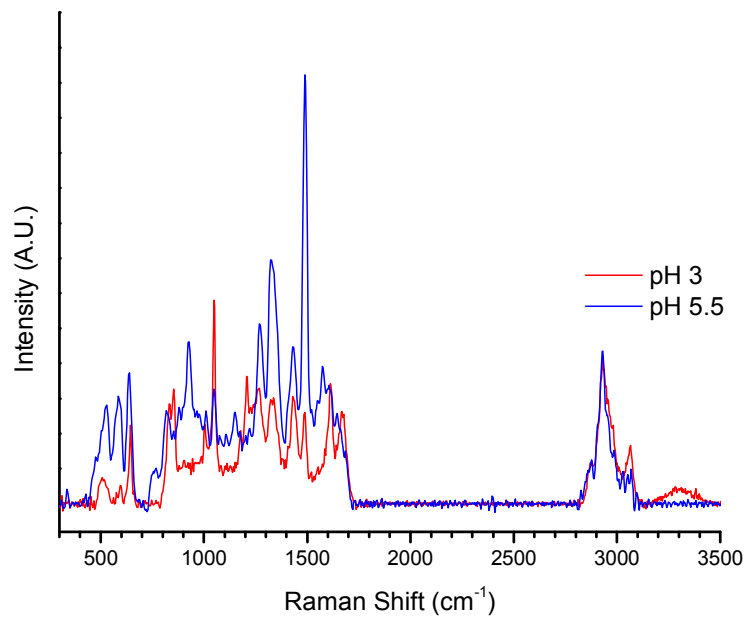

Figure S3. Complete Raman spectra showing normalization to C-H region from 2800-3000 cm<sup>-1</sup>.

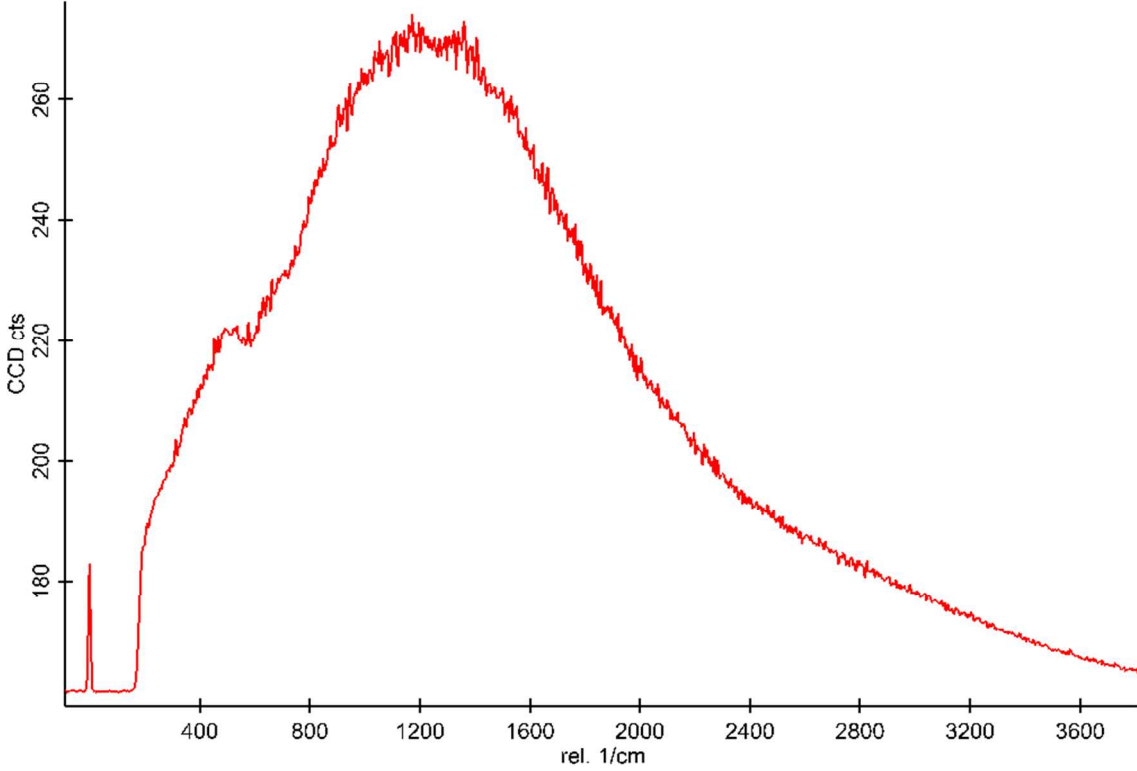

Figure S4. Very strong fluorescence was observed for at the pH=7.5, indicating possible oxidation processes.

### Calculation of the binding energy of Dopa to TiO<sub>2</sub>

Mfp-3 adsorption was done by putting a droplet of 10-15  $\mu\text{L}$  mfp-3 solution (Conc. 5  $\mu\text{g}/\text{ml}$ ) on one TiO<sub>2</sub> surface. The proteins were allowed to adsorb for 20 min followed by rinsing thoroughly with buffer. Assuming full adsorption of mfp-3 gives  $1.07 \times 10^{-11}$  mole of mfp-3 adsorbed on the TiO<sub>2</sub> surface with a Dopa density of  $5.4 \times 10^{-7} / \text{m}^2$ . The strongest adhesion energy measured by SFA is about 6.6  $\text{mJ}/\text{m}^2$ . Although the actual adsorption efficiency of Dopa to each mica surface is unknown, the maximum possible would be 50% - half on each of two surfaces. This provides a lower energy estimation for the Dopa-TiO<sub>2</sub> interaction and leads to a Dopa- TiO<sub>2</sub> binding energy of  $\sim 12$   $\text{kJ}/\text{mol}$  or  $4.9 k_B T$  per bond ( $T = 298\text{K}$ ), which is an order of magnitude larger than the Dopa-mica binding energy ( $\sim 0.9$   $\text{kJ}/\text{mol}$ ).
